# Supplementary material for: Uncovering the gene regulatory network of type 2 diabetes through multi-omic data integration
Source: PubMed Central journal article supplement (PMC9756634; doi:10.1186/s12967-022-03826-5), 2022-12-16

**A**

GOI - SybrGreen

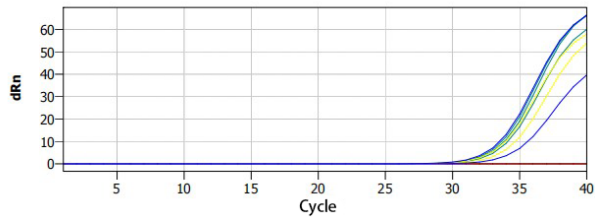**B**

GOI - SybrGreen

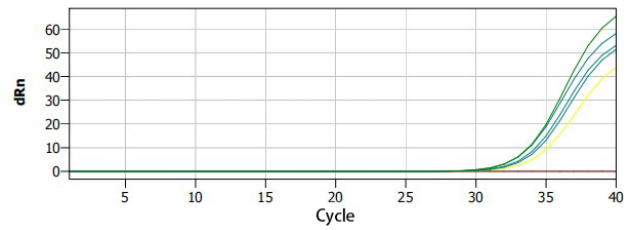**C**

DIF

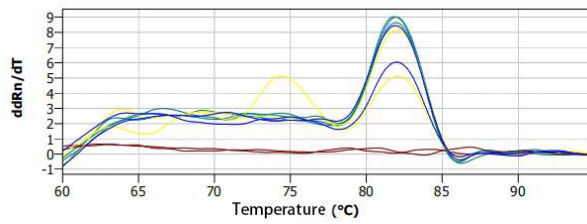**D**

DIF

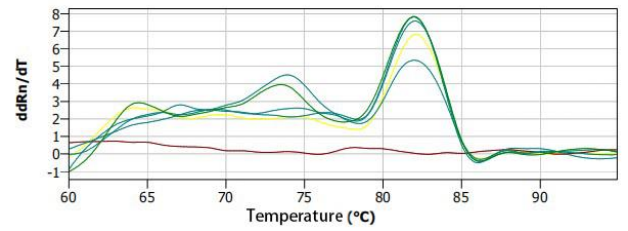**E**

Ref. gene - SybrGreen

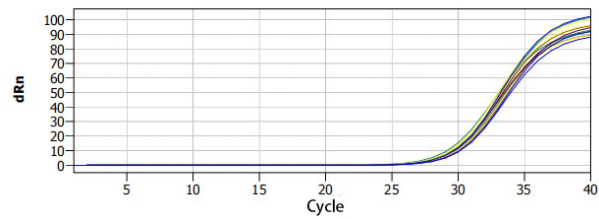**F**

Ref. gene - SybrGreen

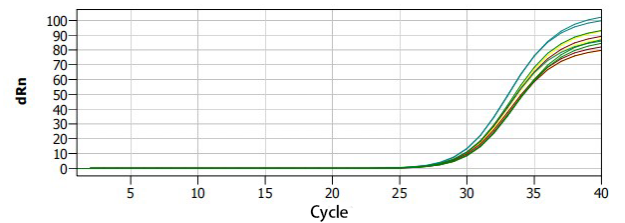**G**

DIF

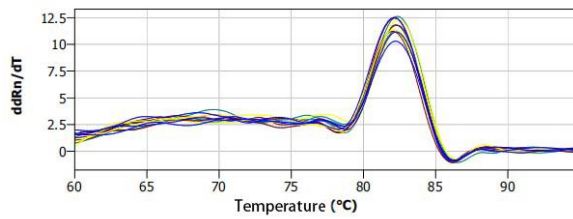**H**

DIF

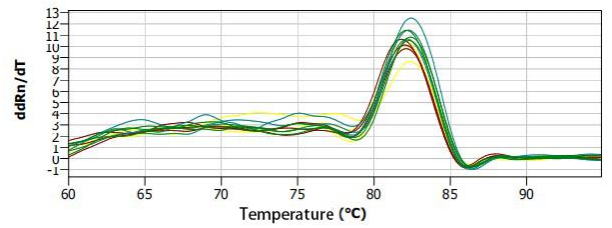

Supplement: 12967_2022_3826_MOESM4_ESM.pdf [file 12967_2022_3826_MOESM4_ESM.pdf]
